# Supplementary material for: dmPFC-vlPAG projection neurons contribute to pain threshold maintenance and antianxiety behaviors
Source: JCI journal article supplement (doi:10.1172/jci127607), 2020-08-25
Supplement: sd1 [file 1]

# Supplementary Information

## Supplementary Tables

**Table S1. Stereotaxic kainic acid (KA), tracer and virus injection.**

| Item                                                               | Nuclei          | Purpose                           | Mice            | Volume  | Manufacture                        |
|--------------------------------------------------------------------|-----------------|-----------------------------------|-----------------|---------|------------------------------------|
| KA (1µg/µl)                                                        | dmPFC           | Nucleus Lesion                    | C57BL/6J        | 0.2 µl  | K0250, Sigma, St. Louis, MO, USA   |
| 10% BDA                                                            | dmPFC           | Anterograde Tracing               | C57BL/6J        | 0.1 µl  | D1956, Invitrogen, Eugene, OR, USA |
| AAV2/9-DIO-EGFP-TVA and AAV2/9-DIO-RG, RV-EnvA-ΔG-dsRed            | vIPAG           | Retrograde Transsynaptic Tracing  | VGLUT2-ires-Cre | 0.3 µl  | BrainVTA, Wuhan, China             |
| AAV2/2-CaMKIIα-hChR2-EYFP or AAV2/2-CaMKIIα-EYFP)                  | dmPFC           | Optogenetic Test                  | C57BL/6J        | 0.3 µl  | BrainVTA, Wuhan, China             |
| AAV2/4-hSyn-DIO-HA-hM3Dq-mCitrine or AAV2/4-hSyn-DIO-HA-mCitrine   | dmPFC           | Chemogenetic Test                 | Vgat-ires-Cre   | 0.3 µl  | BrainVTA, Wuhan, China             |
| 4% FG                                                              | vIPAG, RVM, SDH | Retrograde Tracing                | C57BL/6J        | 0.04 µl | 80014; Biotium; Hayward, CA, USA   |
| retroBeads                                                         | vIPAG           | Retrograde Tracing                | C57BL/6J        | 0.1 µl  | Lumafuor; New York, NY, USA        |
| scAAV2/1-hSyn-FLEX-EGFP- WPRE-pA                                   | dmPFC           | Anterograde Transsynaptic Tracing | C57BL/6J        | 0.3 µl  | Taitool, Shanghai, China           |
| AAV2/2Retro-hSyn-Cre-WPRE-pA                                       | vIPAG           | Retrograde Tracing                | C57BL/6J        | 0.3 µl  | BrainVTA, Wuhan, China             |
| AAV2/9-hSyn-DIO-hM3Dq-eGFP-WPRE-pA and AAV2/9-mDlx-mCherry-WPRE-pA | dmPFC           | Optogenetic and Chemogenetic Test | C57BL/6J        | 0.3 µl  | BrainVTA, Wuhan, China             |

**Table S2. Antibodies used in each group.**

| Antigen             | Primary Antibodies                                                                                                           | Secondary Antibodies                                                                                                                                                                                             |
|---------------------|------------------------------------------------------------------------------------------------------------------------------|------------------------------------------------------------------------------------------------------------------------------------------------------------------------------------------------------------------|
| CaMKII/FG           | Rabbit anti-CaMKII (1:200; ab34703, Abcam, Cambridge, MA, USA)/Gp anti-FG (1:200)                                            | Alexa488-conjugated donkey anti-rabbit IgG (1:500; A-21206, Invitrogen, Carlsbad, CA, USA )/ Alexa594-conjugated goat anti-Gp IgG (1:500; A-11076, Invitrogen)                                                   |
| GAD67/FG            | Mouse anti-GAD67 (1:500; MAB5406, Millipore)/Gp anti-FG (1:200)                                                              | Alexa488-conjugated donkey anti-mouse IgG (1:500; A-21202, Invitrogen)/ Alexa594-conjugated goat anti-Gp IgG (1:500)                                                                                             |
| NeuN/FG             | Mouse anti-NeuN (1:500; MAB377, Millipore)/ Gp anti-FG (1:200)                                                               | Alexa488-conjugated donkey anti-mouse IgG (1:500)/ Alexa594-conjugated goat anti-Gp IgG (1:500)                                                                                                                  |
| NeuN/GFAP           | Rabbit anti-NeuN (1:200; 12943, Cell Signaling Technology)/ Mouse anti-GFAP (1:2,000; MAB3402, Millipore)                    | Alexa488-conjugated donkey anti-mouse IgG (1:500)/ Alexa594-conjugated donkey anti-rabbit IgG (1:500; A-21207, Invitrogen)                                                                                       |
| Fos/DAPI            | Rabbit anti-Fos (1:500; ab209794, Abcam)                                                                                     | Alexa594-conjugated donkey anti-rabbit IgG (1:500)/ DAPI (1:5,000; D1306, Molecular Probes, Eugene, OR, USA)                                                                                                     |
| mCitrine/GA D67/Fos | Chicken anti-GFP (1:200; GFP-1020, Aves Labs, Tigard, OR, USA)/ Mouse anti-GAD67 (1:500)/Rabbit anti-Fos (1:500)             | FITC-conjugated goat anti-chicken IgY (1:500; A16055, Invitrogen)/Alexa594-conjugated donkey anti-mouse IgG (1:500; A-21203, Invitrogen)/Alexa647-conjugated donkey anti-rabbit IgG (1:500; A-31573, Invitrogen) |
| EYFP/FG/Synapsin    | Chicken anti-GFP (1:200)/Gp anti-FG (1:200)/ Rabbit anti-Synapsin (1:500; A-6442, Invitrogen)                                | FITC-conjugated goat anti-chicken IgY (1:500)/Alexa594-conjugated goat anti-Gp IgG (1:500) /Alexa647-conjugated donkey anti-rabbit IgG (1:500)                                                                   |
| EYFP/FG             | Chicken anti-GFP (1:200)/Gp anti-FG (1:200)                                                                                  | FITC-conjugated goat anti-chicken IgY (1:500)/Alexa594-conjugated goat anti-Gp IgG (1:500)                                                                                                                       |
| 5-HT/FG/VGLUT2      | Goat anti-5-HT (1:200; 20079, ImmunoStar, Houston, Texas, USA)/ Gp anti-FG (1:200)/Rabbit anti-VGLUT2 (1:500; ab2251, Abcam) | Alexa488-conjugated donkey anti-rabbit IgG (1:500)/Alexa594-conjugated donkey anti-Goat IgG (1:500; A-11058, Invitrogen) /Alexa647-conjugated donkey anti-Gp IgG (1:500; AP193SA6, Millipore)                    |
| Biocytin/DAPI       | NA                                                                                                                           | FITC-conjugated avidin (1:1,000; A-2001, Vector Laboratories) / DAPI (1:5,000)                                                                                                                                   |
| EYFP/Fos            | Chicken anti-GFP (1:200)/Rabbit anti-Fos (1:500)                                                                             | FITC-conjugated goat anti-chicken IgY (1:500)/Alexa594-conjugated donkey anti-rabbit IgG (1:500)                                                                                                                 |

## Supplementary Figures

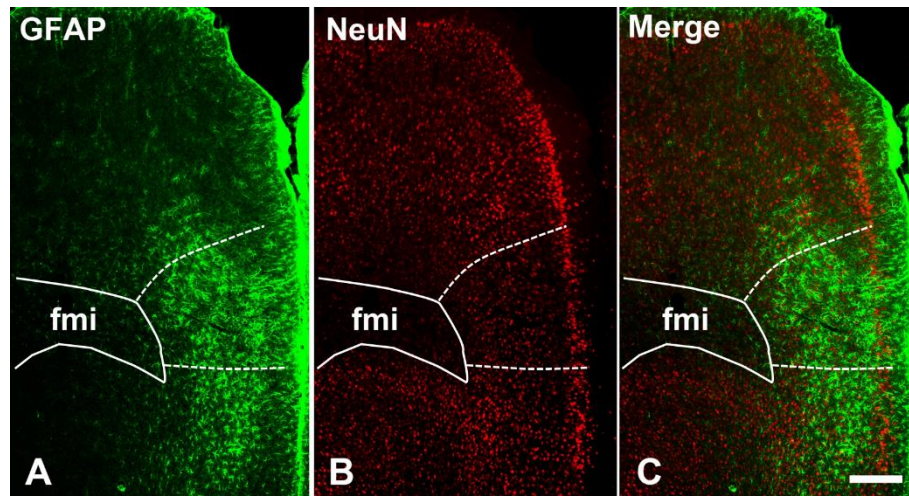

**Figure S1. Injection of KA into the dmPFC induces the neuronal loss and astrocytic proliferation in the injection site.**

The double fluorescence immunostaining of GFAP (**A**) and NeuN (**B**) after the injection of KA into the dmPFC. (**C**) Merged image from **A-B**. fmi: forceps minor of the corpus callosum, the area between the two dash line is dmPFC. Scale bars=200  $\mu$ m in **C** (applied in **A-B**).

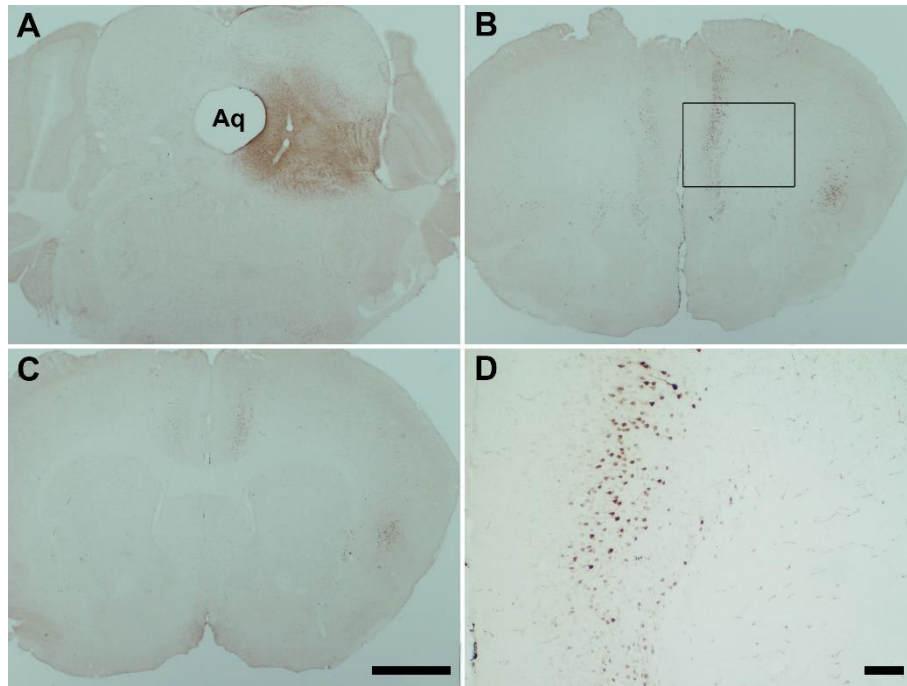

**Figure S2. Distribution of retrogradely labeled neurons in the dmPFC after FG was injected into the vlPAG.**

Photomicrographs showing FG injection sites in the vlPAG (**A**) and the resultant of FG-labeled neurons in the dmPFC (**B**) and ACC (**C**). The area in the black frame in **B** was magnified in **D**. (**D**) The retrogradely FG-labeled neurons were mainly distributed in the layer V of the dmPFC. Scale bars=300  $\mu\text{m}$  in **C** (applied in **A-B**), 100  $\mu\text{m}$  in **D**.

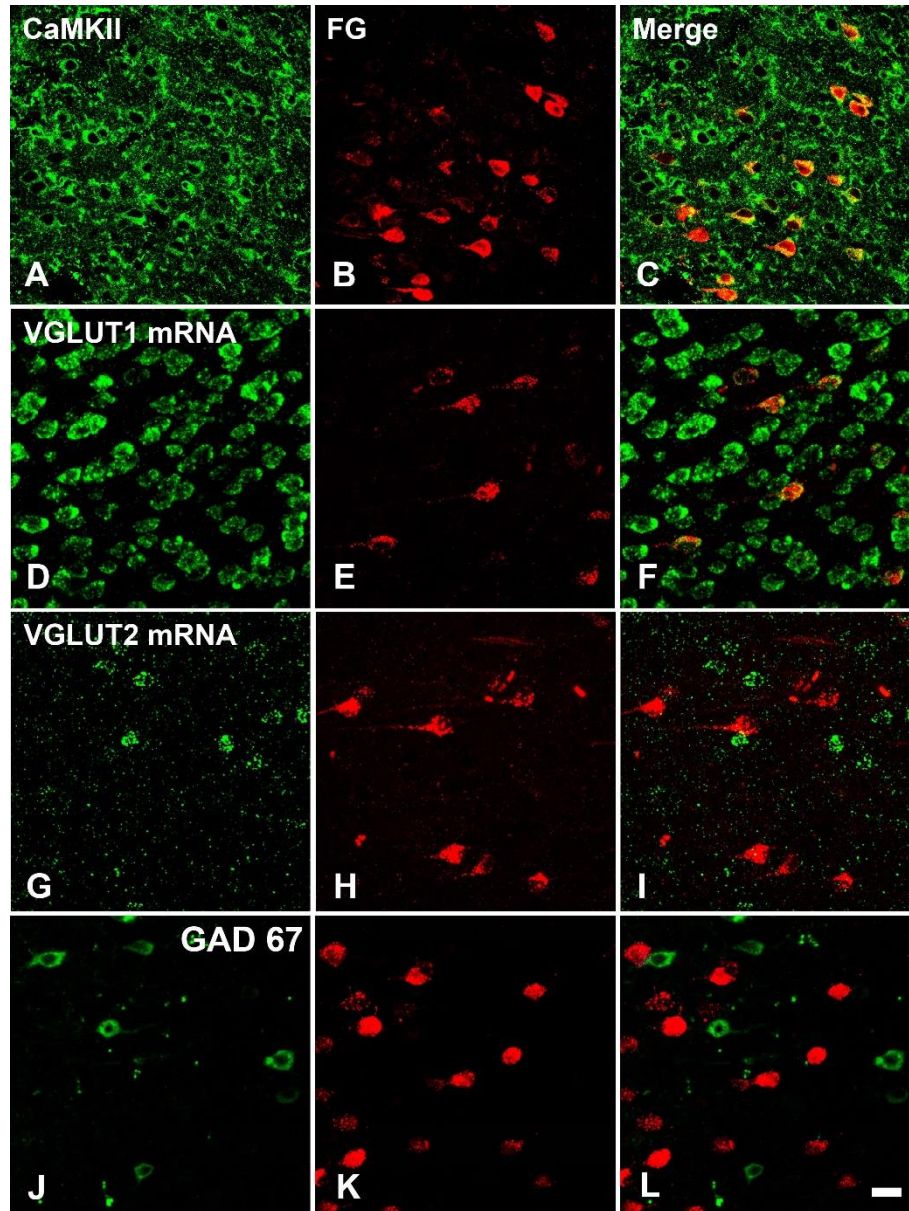

**Figure S3. Fluorescent photomicrographs showing the distributions of CaMKII-ir neurons, VGLUT1 or VGLUT2 mRNA-containing neurons, GAD67-ir neurons and FG labeled neurons in the dmPFC after FG was injected into the vIPAG.**

(A-C) All the FG-labeled neurons (red) in the dmPFC expressed CaMKII (green). (D-F) All the FG-labeled neurons (red) in the dmPFC contained VGLUT1 mRNA (green). The FG-labeled neurons (red) in the dmPFC did not contain VGLUT2 mRNA (green) (G-I) express GAD67 (J-L). Scale bars=20  $\mu$ m in L (applied in A-K).



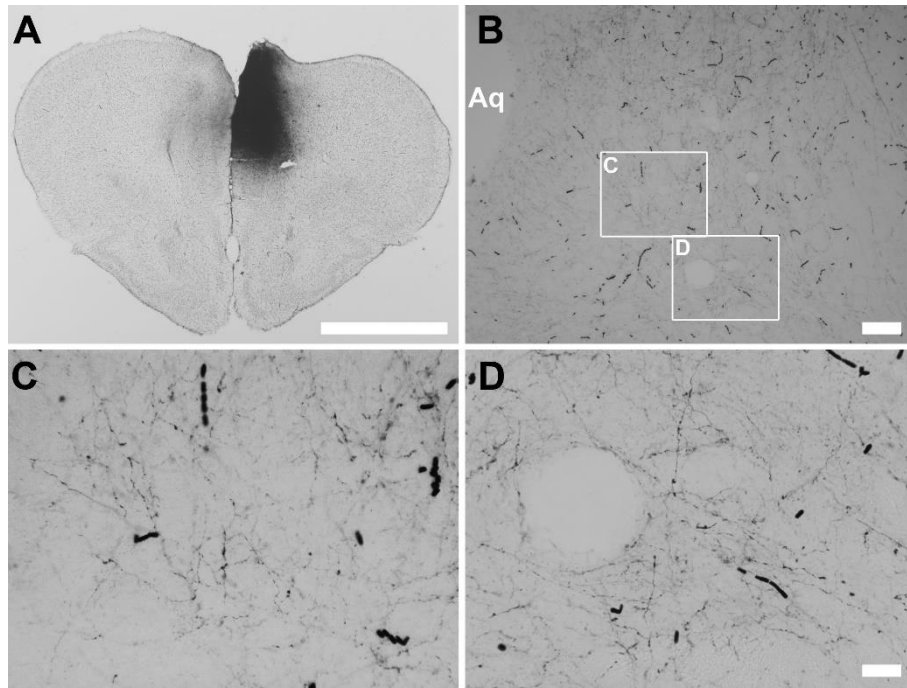

**Figure S4. The projections from the dmPFC to the vlPAG.**

(A) Photomicrographs showing the BDA injection site in the dmPFC. (B) Anterogradely BDA-labeled axonal fibers and terminals originated from the dmPFC were mainly observed on the ipsilateral side of the lPAG and vlPAG. (C-D) The rectangular areas in (B) were enlarged and displayed in (C) and (D). Scale bars=500  $\mu\text{m}$  in A, 100  $\mu\text{m}$  in B, 25  $\mu\text{m}$  in D (applied in C).

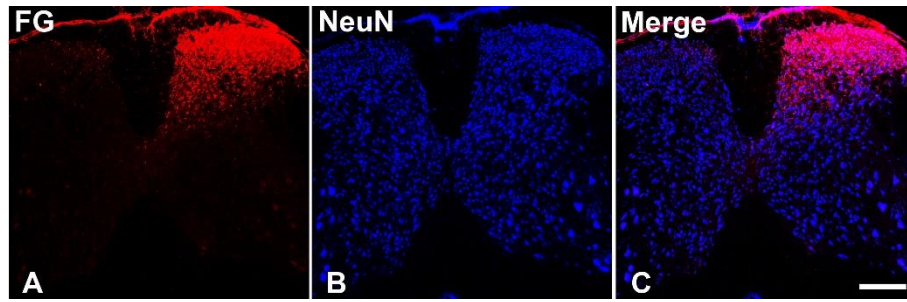

**Figure S5. Fluorescence photomicrographs showing the FG injection site in the spinal cord.**

(A-C) Fluorescence photomicrographs showing the double staining of FG (red) and NeuN (blue) in the spinal cord. Scale bars=200  $\mu\text{m}$  in C (applied in A-B).

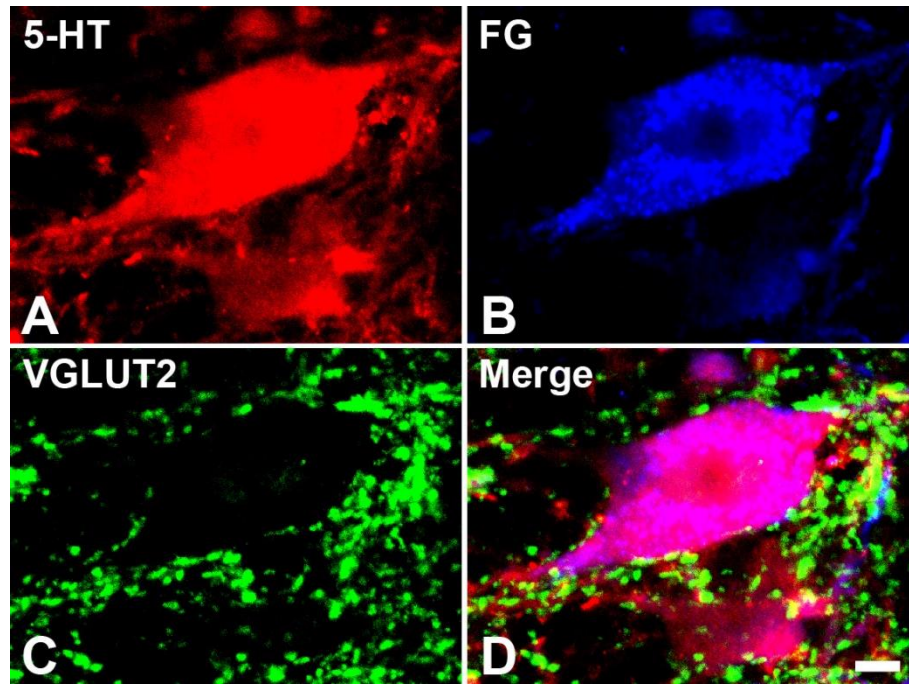

**Figure S6. The connection between VGLUT2-ir terminals and 5-HT- and/or FG-ir neurons in the RVM.**

(A-D) Fluorescence photomicrographs showing that VGLUT2-ir axon terminals (C, green) made close connections with a 5-HT-ir (A, red) neuronal cell body projecting to the spinal cord (B, FG-ir, blue) in the RVM. Scale bars=5  $\mu$ m in D (applied in A-C).



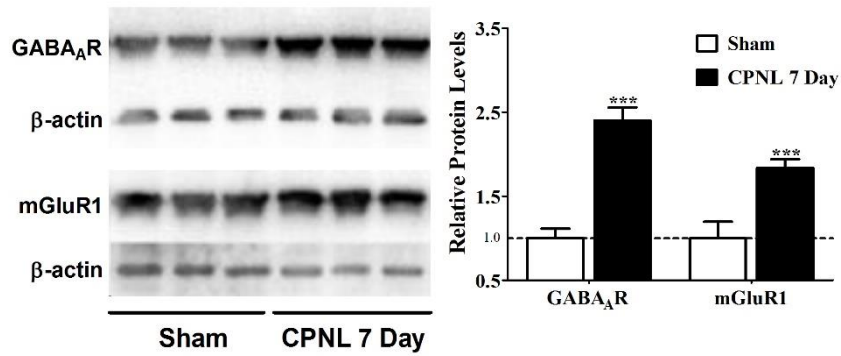

**Figure S7. The expressions of GABA<sub>A</sub>R and mGluR1 were remarkably increased in the dmPFC after CPNL 7 days.**

The expressions of GABA<sub>A</sub>R and mGluR1 in the dmPFC of each mice in different groups, were revealed by Western blot. The *bar graphs* (right) demonstrated the mean levels of GABA<sub>A</sub>R and mGluR1 normalized to  $\beta$ -actin. The asterisk was used, when CPNL 7 Day group was compared with sham group. \*\*\* $P$ <0.001, Student's  $t$ -test,  $n$ =3 in each group.

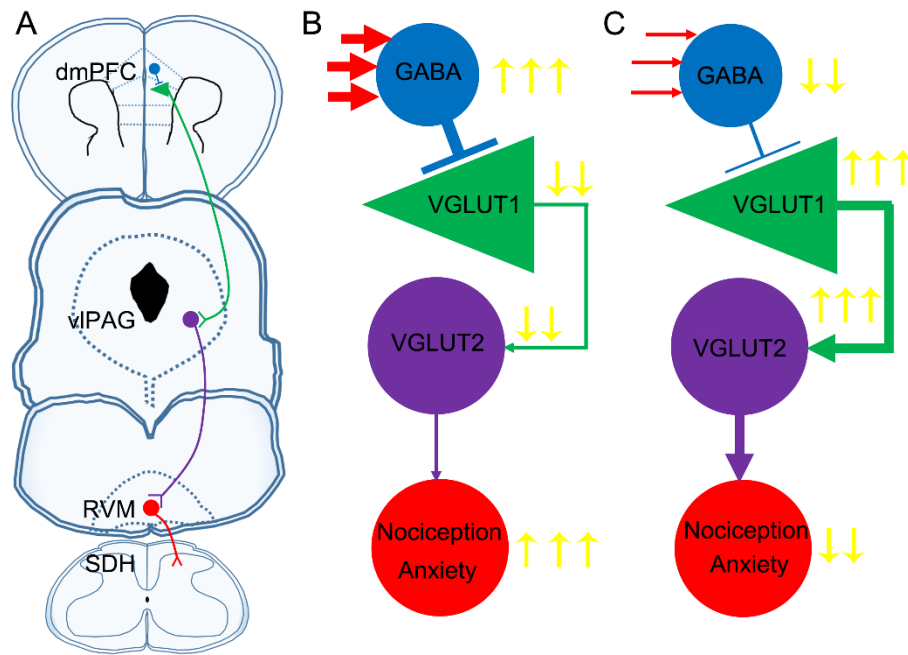

**Figure S8. Graphical abstract**

(A) Schematic diagram of putative ‘Top-Down’ descending neural pathway, dmPFC-vIPAG-RVM-SDH. We hypothesize that periphery nerve injury induces increased excitatory inputs to the inhibitory neurons in the dmPFC, which then deactivates the descending dmPFC-vIPAG neural pathway. These in turn lead to mechanical hyperalgesia and anxiety-like behaviors (B). The deactivation of inhibitory neurons in the dmPFC or activating dmPFC-vIPAG neural pathway produces analgesic and anxiolytic effects (C).
